# Supplementary material for: Solvent-induced reversible high-temperature phase transition in crown ether clathrates
Source: Royal Society of Chemistry journal article supplement (doi:10.1039/d2nj00642a), 2022-01-01
Supplement: d2nj00642a1.pdf [file d2nj00642a1.pdf]

**New Journal of Chemistry**  
**Electronic Supporting Information**

**Solvent-induced Reversible High-temperature Phase Transition in**  
**Crown Ether Clathrates**

Ke Zou, Tie Zhang, Kun Ding, Sai-Nan Cheng, Yi Zhang\*, Jia-Zhen Ge\*, Da-Wei Fu\*

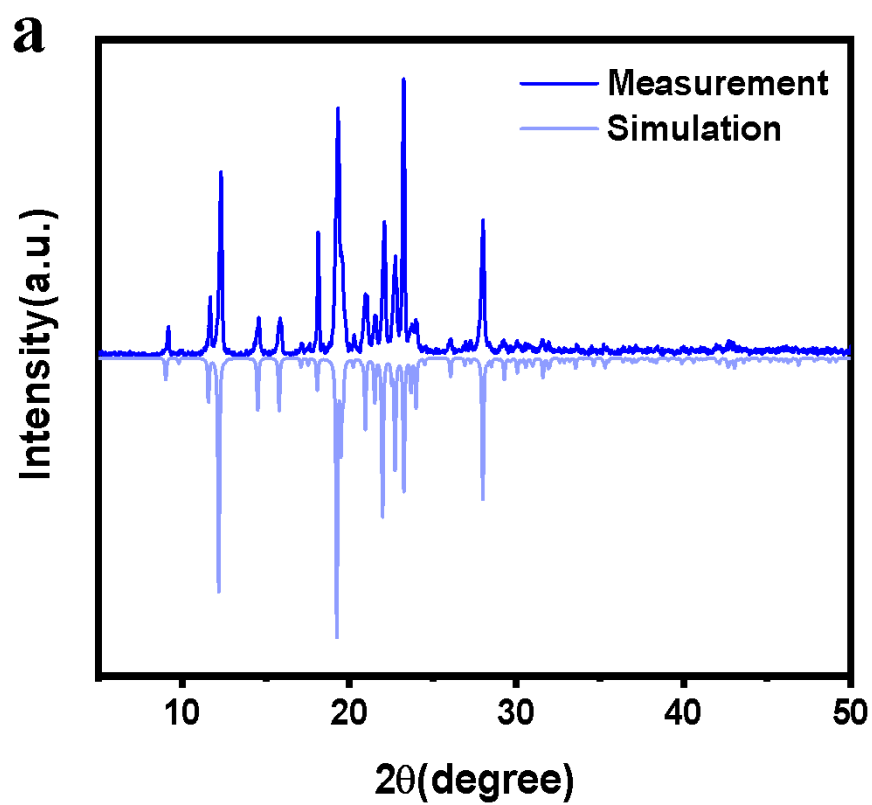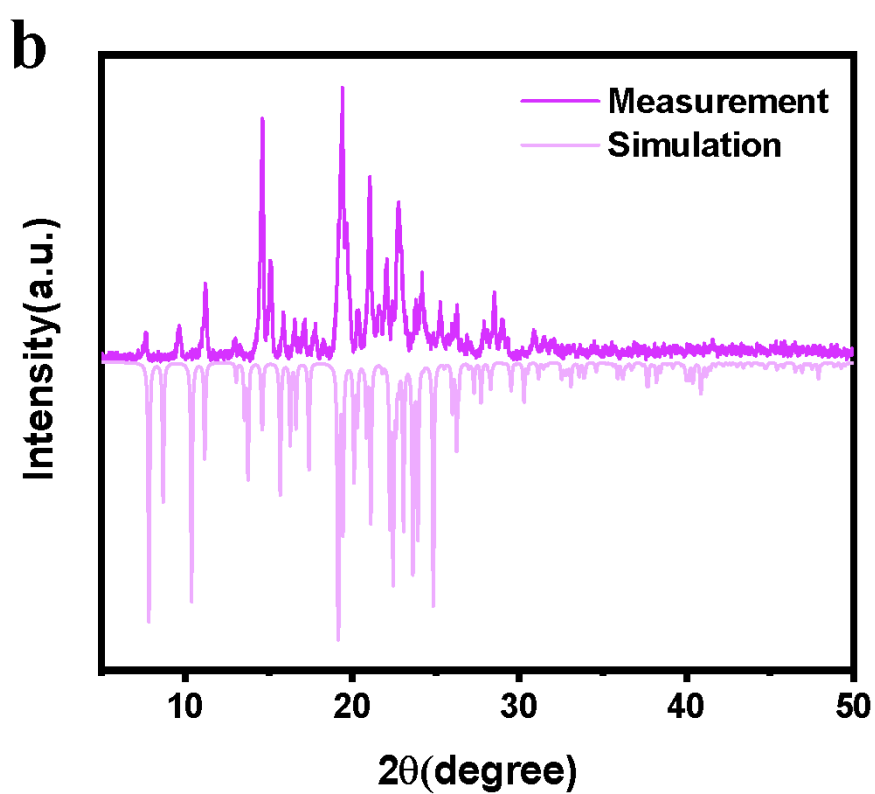

Fig. S1 The experimental and simulated PXRD patterns of compound 1 (a) and 1-ACN (b) at 298K.

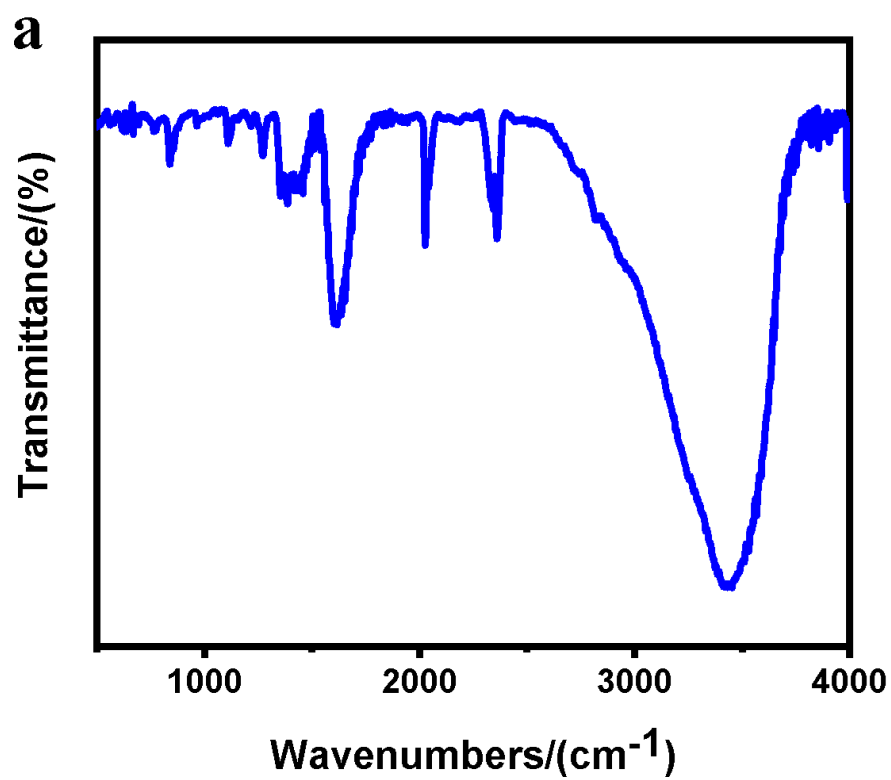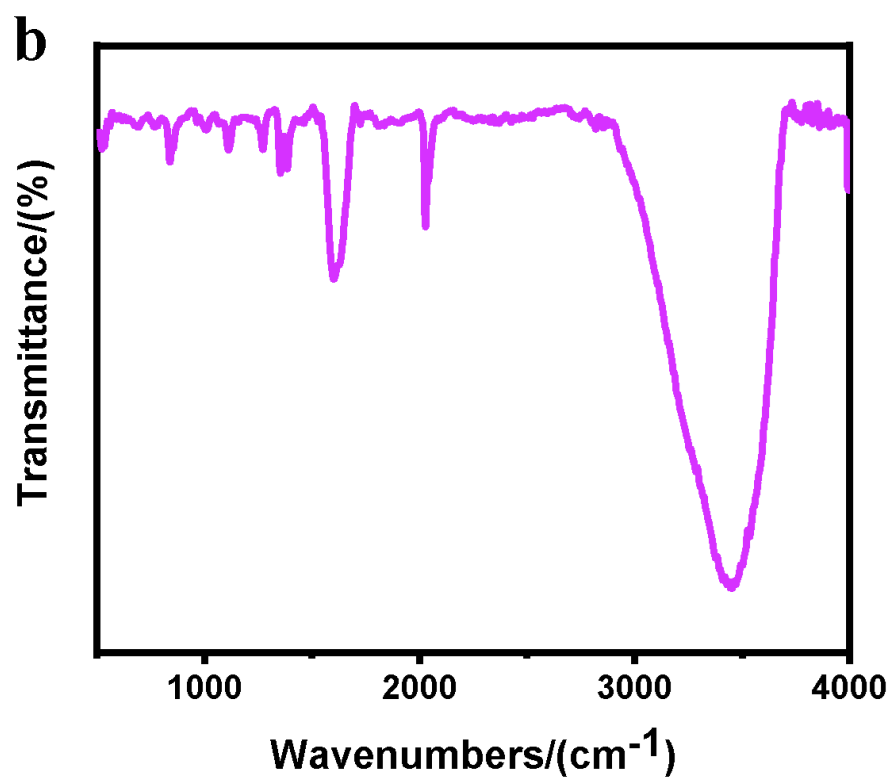

Fig. S2 The IR spectrum of compound **1** (a) and **1-ACN** (b).

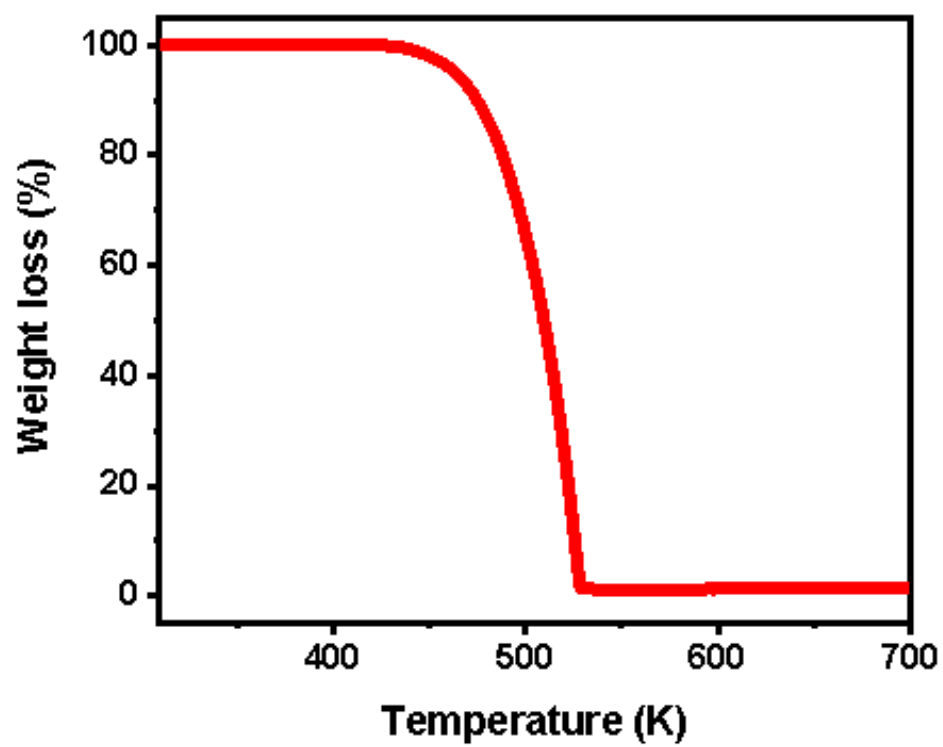

Fig. S3 TGA curve of compound 1·ACN.

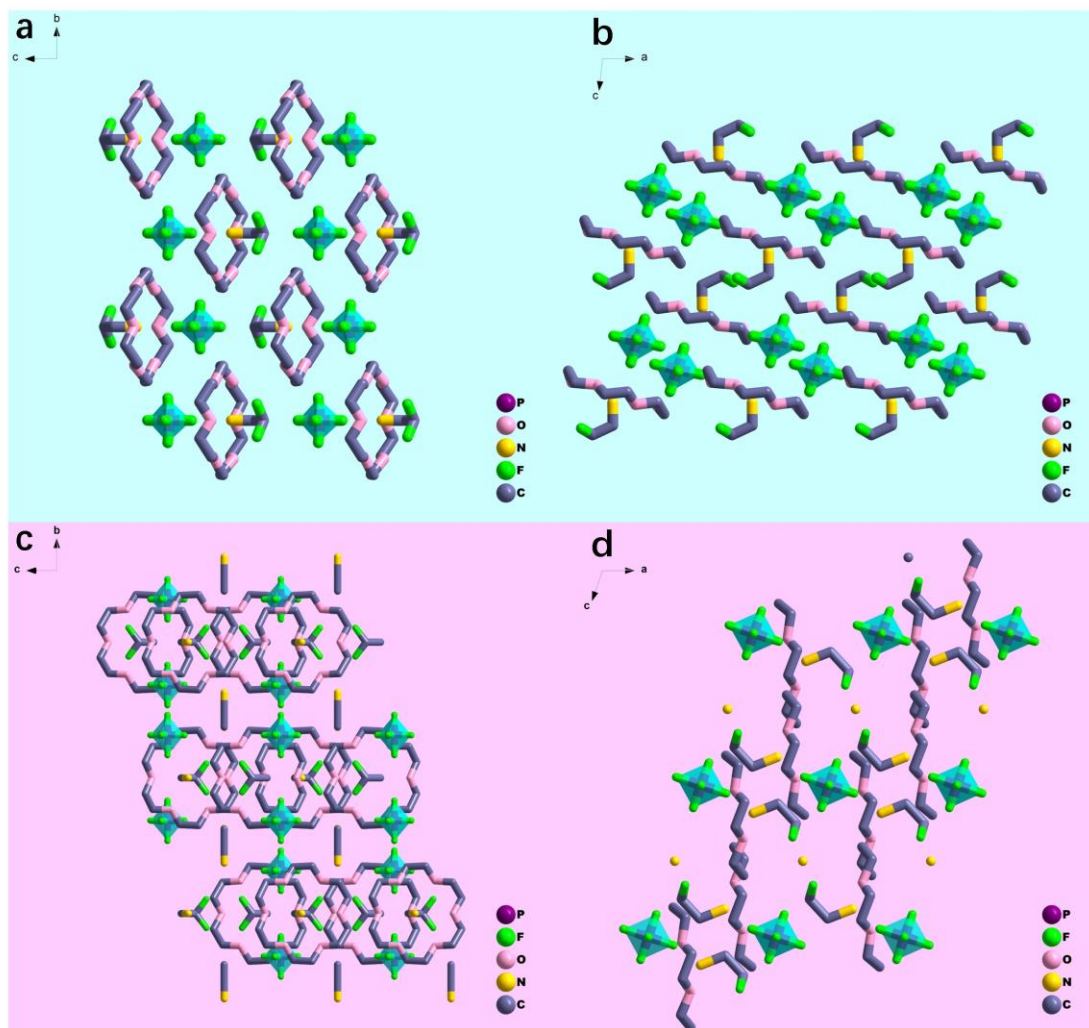

**Fig. S4** The diagrams of the packing structures of compound **1** along the *a*-axis (a) and along the *b*-axis (b). The diagrams of the packing structures of compound **1·ACN** along the *a*-axis (c) and along the *b*-axis (d). Hydrogen atoms are omitted for clarity.

**Tab. S1** Crystal data of compound **1** at 223 K and compound **1·ACN** at 208 K

|                          | <b>1</b>              | <b>1·ACN</b>         |
|--------------------------|-----------------------|----------------------|
| Formula                  | 491.35                | 532.41               |
| <i>T</i> (K)             | 223                   | 208                  |
| Crystal system           | monoclinic            | monoclinic           |
| Space group              | <i>P</i> 21/ <i>m</i> | <i>P</i> 2/ <i>m</i> |
| <i>a</i> /Å              | 9.0833(9)             | 9.0149(4)            |
| <i>b</i> /Å              | 12.1944(10)           | 20.3713(7)           |
| <i>c</i> /Å              | 9.8627(10)            | 14.2323(6)           |
| $\alpha$ (deg)           | 90                    | 90                   |
| $\beta$ (deg)            | 96.197(9)             | 107.599(5)           |
| $\gamma$ (deg)           | 90                    | 90                   |
| <i>V</i> /Å <sup>3</sup> | 1086.06(18)           | 2491.36(19)          |
| <i>Z</i>                 | 2                     | 4                    |
| <i>F</i> (000)           | 512.0                 | 1112.0               |
| radiation type           | Mo K $\alpha$         | Mo K $\alpha$        |
| GOF                      | 0.998                 | 0.960                |
| <i>R</i> 1               | 0.0968                | 0.0915               |
| <i>wR</i> 2              | 0.2005                | 0.1706               |

**Tab. S2** Selected bond lengths and bond angles for compound **1** at 223 K

| Temperature | Bond lengths [Å] |          | Bond angles [°] |          |
|-------------|------------------|----------|-----------------|----------|
| 223 K       | P1—F5            | 1.533(4) | F3—P1—F6        | 178.0(3) |
|             | P1—F3            | 1.498(4) | F6—P1—F2        | 96.9(3)  |
|             | P1—F6            | 1.522(4) | F5—P1—F2        | 178.7(2) |
|             | O4—C6            | 1.409(4) | F3—P1—F2        | 85.0(2)  |
|             | O3—C5            | 1.421(4) | C4—O3—C5        | 111.9(3) |
|             | O3—C4            | 1.417(4) | C2—O2—C3        | 113.7(3) |
|             | O2—C3            | 1.432(5) | O4—C6—C5        | 109.3(3) |
|             | O2—C2            | 1.429(4) | O3—C5—C6        | 109.0(3) |
|             | O1—C1            | 1.424(5) | O3—C4—C3        | 109.0(3) |
|             | F1—C7            | 1.358(4) | O1—C1—C2        | 110.6(3) |
|             | N1—C8            | 1.478(5) | O2—C3—C4        | 108.5(3) |
|             | C8—C7            | 1.466(6) | O2—C2—C1        | 107.8(3) |
|             | C6—C5            | 1.479(5) | C7—C8—N1        | 114.4(3) |
|             | C4—C3            | 1.485(6) | F1—C7—C8        | 110.4(3) |

**Tab. S3** Selected bond lengths and bond angles for compound **1·ACN** at 208 K and 296 K

| Temperature | Bond lengths [Å] |           | Bond angles [°] |          |
|-------------|------------------|-----------|-----------------|----------|
| 208 K       | P1—F3            | 1.493(7)  | F3—P1—F1        | 180      |
|             | P1—F1            | 1.520(7)  | F4—P1—F3        | 89.9(3)  |
|             | P1—F4            | 1.476(5)  | F2—P1—F3        | 90.4(5)  |
|             | N1—C1            | 1.484(8)  | F4—P1—F1        | 90.1(3)  |
|             | C10—C9           | 1.489(8)  | F2—P1—F1        | 89.6(5)  |
|             | C8—C7            | 1.495(8)  | C8—O3—C9        | 112.2(4) |
|             | F5—C2            | 1.356(5)  | C6—O2—C7        | 113.0(5) |
|             | O3—C8            | 1.426(6)  | C2—C1—N1        | 111.6(5) |
|             | O3—C9            | 1.429(6)  | F5—C2—C1        | 109.8(4) |
|             | O1—C5            | 1.429(7)  | O3—C9—C10       | 108.7(4) |
|             | O2—C7            | 1.420(7)  | O2—C6—C5        | 108.6(5) |
|             | 296 K            | P1—F3     | 1.527(3)        | F6—P1—F3 |
| P1—F5       |                  | 1.508(5)  | F4—P1—F6        | 180      |
| P1—F6       |                  | 1.491(5)  | F4—P1—F3        | 92.8(2)  |
| N1—C7       |                  | 1.495(7)  | C2—O2—C3        | 113.4(4) |
| F1—C8       |                  | 1.352(5)  | C5—O3—C4        | 113.7(4) |
| C10—N2      |                  | 1.139(10) | C8—C7—N1        | 111.5(5) |
| O4—C6       |                  | 1.414(7)  | O1—C1—C2        | 109.5(5) |
| O3—C4       |                  | 1.412(7)  | O3—C4—C3        | 108.5(5) |
| O2—C3       |                  | 1.433(6)  | O2—C3—C4        | 109.5(4) |
| O1—C1       |                  | 1.406(6)  | O2—C2—C1        | 109.0(4) |
| C4—C3       |                  | 1.472(8)  | O4—C6—C5        | 108.5(5) |
| C6—C5       |                  | 1.505(9)  | O3—C5—C6        | 108.8(5) |
